# Supplementary material
Source: PubMed Central journal article supplement (PMC6479026)
Supplement: IAI.00887-18-s0001.pdf [file IAI.00887-18-s0001.pdf]

Aranjuez et al. 2019  
SUPPLEMENTAL MATERIALS

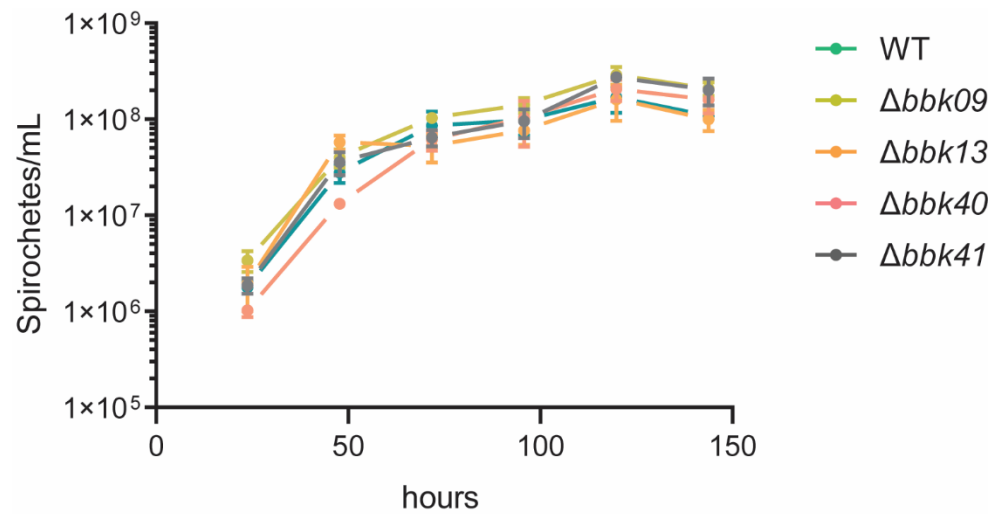

**Figure S1. Targeted deletion mutants have similar *in vitro* growth curve kinetics as wild type *B. burgdorferi*.** Triplicate cultures of WT,  $\Delta bbk09$ ,  $\Delta bbk13$ ,  $\Delta bbk40$ , and  $\Delta bbk41$  were inoculated at  $10^5$  spirochetes/ml. Culture densities were determined using Petroff Hausser counting chambers every 24 hrs over a 144 hr period. Symbols and error bars represent the mean  $\pm$  SEM.

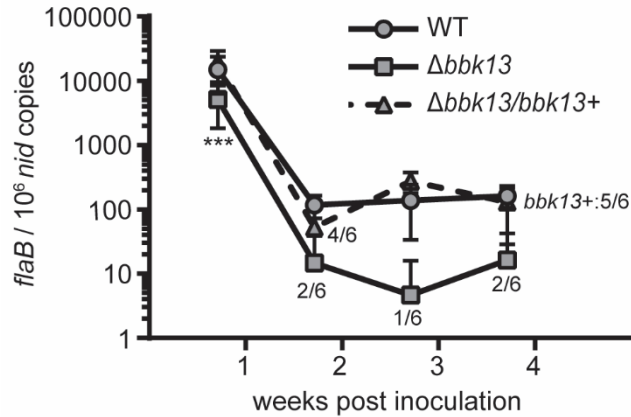

**Figure S2. Spirochete loads in the skin inoculation site demonstrate a dramatic *bbk13*-independent reduction following 1 week post-inoculation.** Spirochete load kinetics at the skin inoculation site were determined by qPCR at different time points post intradermal inoculation of groups of 6 C3H/HeN mice with  $10^4$  WT,  $\Delta$ *bbk13*, or  $\Delta$ *bbk13/bbk13+* *B. burgdorferi*, as described in Figure 2. The data are presented as *flaB*/ $10^6$  *nid* copies. Late kinetics were determined by quantitating spirochete loads in the skin inoculation sites at week 1, 2, 3 and 4 post inoculation. Symbols and error bars represent the mean  $\pm$  standard deviation. For samples sets in which the spirochete loads in some or all of the tissues from the groups of 6 mice were below the level of detection, the number of tissues out of 6 with detectable loads are indicated. Two-way ANOVA and Tukey's multiple comparisons was used to test for statistical significance compared to WT (\*\*\*,  $p < 0.0001$ ).

Table S1. Primers and probes used this in study.

| Primer or probe no. | Designation              | Sequence (5'-3')                                    |
|---------------------|--------------------------|-----------------------------------------------------|
| 1255                | flaBpaadA F              | TGTCTGTCGCCTCTTGTG                                  |
| 1256                | flaBpaadA R              | TTATTTGCCGACTACCTTGGTG                              |
| 1987                | bbk09 left homology fwd  | GGAGTATCCTTTACTTCTA                                 |
| 1988                | bbk09 left homology rev  | CGGAAGCCACAAGAGGGCGACAGACAGTTAAAAATCAAATAGTTG       |
| 1989                | bbk09 right homology fwd | GGCGAGATCACCAAGGTAGTTCGGCAAATAATAGGCATTTATGAGATTTTT |
| 1990                | bbk09 right homology rev | TTGACAACATTAATTCGTAG                                |
| 1971                | bbk13 left homology fwd  | CCACAGGCCTAAGTTC                                    |
| 1972                | bbk13 left homology rev  | GGCGAGATCACCAAGGTAGTTCGGCAAATAATATTTGGCGAACTATTTTT  |
| 1973                | bbk13 right homology fwd | CGGAAGCCACAAGAGGGCGACAGACAAGATTGACCTCCTAAAAGC       |
| 1974                | bbk13 right homology rev | AAAAGTTCATTCTTTTCTCC                                |
| 1991                | bbk40 left homology fwd  | GTGTGATATAACAGAAGCAT                                |
| 1992                | bbk40 left homology rev  | CGGAAGCCACAAGAGGGCGACAGACATAACCCTCCTTTACTGC         |
| 1993                | bbk40 right homology fwd | GGCGAGATCACCAAGGTAGTTCGGCAAATAATGTAAGTGTACTTATCCAT  |
| 1994                | bbk40 right homology rev | CACACTAAACCAATCTCTTA                                |
| 1983                | bbk41 left homology fwd  | GATGAGTTTAGAAGTGGAAAT                               |
| 1984                | bbk41 left homology rev  | GGCGAGATCACCAAGGTAGTTCGGCAAATAACTAGCACAACAATATCTTC  |
| 1985                | bbk41 right homology fwd | CGGAAGCCACAAGAGGGCGACAGACAATTGTGCTTTAATCTTATCAA     |
| 1986                | bbk41 right homology rev | AGCAATTATGCTCCTTTATT                                |
| 2156                | K13 ORF fwd              | GTTGTTGTGCGACTCAATCCAAATAATAAGAAACGG                |
| 2157                | K13 promoter rev         | GTTGTTGTGCGACGAAATGTTAAATAATTATGTGC                 |
| 2335                | k13 out SacI pET28A fwd  | GTTGTTGAGCTCTCAATCCAAATAATAAGAAACGG                 |
| 2336                | k13 out BamHI pET28A rev | GTTGTTGGATCCGGAATAAAAAACATTGGCACC                   |
| 2416                | K13 qPCR fwd 2           | TCGCCAAGCTTCTATCAAT                                 |
| 2417                | K13 qPCR rev 2           | TGAGAAAATGGAAGCAGCAG                                |
| 1123                | recA F                   | AATAAGGATGAGGATTGGTG                                |
| 1124                | recA R                   | GAACCTCAAGTCTAAGAGATG                               |
| 1137                | flaB-taqman-FWD          | TCTTTTCTCTGGTGAGGGAGCT                              |
| 1138                | flaB-taqman-REV          | TCCTTCCTGTTGAACACCCTCT                              |
| 1140                | Nid-taqman-FWD           | CACCCAGCTTCGGCTCAGTA                                |
| 1141                | Nid-taqman-REV           | TCCCCAGGCCATCGGT                                    |
| 1139                | flaB-taqman-Probe        | 6-FAM-AAACTGCTCAGGCTGCACCGGTTC-TAMRA                |
| 1142                | Nid-taqman-Probe         | 6-FAMCGCCTTTCCTGGCTGACTTGGACA-TAMRA                 |
